## RESEARCH ARTICLE

## Waste reduction decreases rat activity from peri-urban environment

Ishana Shukla<sup>1\*</sup>, Christopher C. Wilmers<sup>2</sup>

**1** Department of Ecology and Evolutionary Biology, University of California, Santa Cruz, Santa Cruz, California, United States of America, **2** Department of Environmental Studies, University of California, Santa Cruz, Santa Cruz, California, United States of America

\* [ishana.shukla@gmail.com](mailto:ishana.shukla@gmail.com)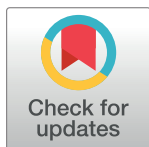

## Abstract

Globally, species in the genus *Rattus* (specifically *Rattus rattus* and *Rattus norvegicus*), are some of the most influential invasive taxa due to their high rates of competitive exclusion and large dietary breadth. However, the specific foraging strategies of urban-adjacent populations remain largely unknown. We examined *Rattus* spp. dependency on human food supplementation in a population on adjacent non-developed (or peri-urban) land. Via linear regression modeling, we measured rodent activity changes between native and invasive species before and after a decrease in human supplementation due to the COVID-19 lockdown in Santa Cruz, California, USA. We documented invasive rat activity via camera traps in normal (pre-COVID lockdown) conditions near dining halls and similar waste sources, and again under COVID lockdown conditions when sources of human supplementation were drastically decreased. After 120 trap nights we found a significant decrease ( $p < 0.001$ ) in *Rattus* activity after the removal of human refuse, while native small mammal activity remained unchanged ( $p = 0.1$ ). These results have strong conservation implications, as they support the hypothesis that proper waste management is an effective, less-invasive form of population control over conventional rodenticides.

## OPEN ACCESS

**Citation:** Shukla I, Wilmers CC (2024) Waste reduction decreases rat activity from peri-urban environment. PLoS ONE 19(11): e0308917. <https://doi.org/10.1371/journal.pone.0308917>

**Editor:** Vitor Hugo Rodrigues Paiva, MARE – Marine and Environmental Sciences Centre, PORTUGAL

**Received:** February 16, 2024

**Accepted:** August 1, 2024

**Published:** November 13, 2024

**Copyright:** © 2024 Shukla, Wilmers. This is an open access article distributed under the terms of the [Creative Commons Attribution License](https://creativecommons.org/licenses/by/4.0/), which permits unrestricted use, distribution, and reproduction in any medium, provided the original author and source are credited.

**Data Availability Statement:** All relevant data are uploaded to GitHub and publicly accessible via the following URL: [https://github.com/ishana-s/Invasive\\_Rats\\_Refuse](https://github.com/ishana-s/Invasive_Rats_Refuse).

**Funding:** Financial Support for this research was provided by a Norris Center Student Award from the Kenneth S. Norris Center for Natural History (to IS). our funders had no role in study design, data collection and analysis, decision to publish, or preparation of the manuscript.

**Competing interests:** The authors have declared that no competing interests exist.

## Introduction

Human refuse attracts synanthropic rodent species, and these local populations can use this supplementation to bolster their shelter opportunities, reduce predation risk, and notably, supplement their diet [1]. This supplementation can promote population growth of invasive species and/or lead to high equilibrium levels of such species [2, 3]. While not all species in a community will benefit from human supplementation, the indirect and direct effects of these benefits can expand outside the species level and impact large portions of the food web [4].

Two species in the genus *Rattus* (i.e., the black rat *Rattus rattus* and the brown rat *Rattus norvegicus*) currently stand as some of the most widespread invasive taxa worldwide, and their presence is documented on all continents, save for Antarctica [5, 6]. Known for their resourceful foraging strategies, these invasive *Rattus* species can affect native populations of small rodents through both predation and competitive exclusion [7, 8]. Generally, invasive rats are

classified as facultative foragers due to their varied diet. Despite their generalist reputation, invasive rat dietary breadth between island and mainland populations has the potential to differ significantly due to differences in resource types [9]. Island populations of invasive rats show extreme resourcefulness and a large dietary breadth, but the degree to which mainland peri-urban populations' foraging strategies differ remains largely unexplored [7, 10].

Prior studies suggest that strictly urban populations of invasive rats have a dietary preference for human refuse—a pattern that spans multiple geographies [11, 12]. Current urban invasive rat literature centers largely on pest control management and reiterates strong ties between human refuse and invasive rat activity [10, 13, 14]. While access to food, water, and shelter all contribute to a rat's urban habitat selection, food supplementation is thought to be paramount in determining population levels [15]. Parallel urban pandemic studies that monitored rat-bait stations or pest control complaints in cities report overall mixed invasive rat activity, but most suggest a redistribution of population structure [16–18]. Still, these studies focus on completely urbanized populations, and lesser known is the degree to which peri-urban populations depend on human supplementation [19]. In ideal circumstances, foraging dependency would be tested with removal experiments, but these experiments are generally difficult to carry out. The experimental site would have to undergo extreme environmental manipulation and be monitored for multiple seasons to account for any relaxation time for a population to reach a new equilibrium. Nonetheless, these experiments can provide results on obligate foraging and specialized dependency in a population [20]. Here, with a natural removal experiment, we test the hypothesis that established, peri-urban populations of invasive *Rattus* species are human-obligate foragers and are dependent on nutritional supplementation from human refuse to maintain population levels. We predict little to no changes in native small mammal activity, as we hypothesize that native small mammals are less reliant on this human supplementation. We test this by taking advantage of an abrupt reduction in human food supplementation via COVID-19 (hereafter COVID) lockdowns in Santa Cruz County, California, USA, and analyzed the change in invasive rat activity via camera trapping.

## Materials and methods

### Study area and removal experiment

All data were collected on the University of California, Santa Cruz (UC Santa Cruz) campus and adjacent non-developed land (hereafter “peri-urban”), spanning a total area of 2.12 km<sup>2</sup> (Fig 1). A number of native small rodents are found throughout the UC Santa Cruz campus, including deer mice *Peromyscus californicus*, pinyon mice *Peromyscus trueii*, and dusky-footed woodrats *Neotoma fuscipes* [21]. The peri-urban land on campus is located on a natural reserve and primarily consists of three forest types: mixed oak woodland, redwood, and mixed redwood habitat. The mixed oak woodland is primarily composed of tanoak *Notholithocarpus densiflorus*, pacific madrone *Arbutus menziesii* and Shreve oak *Quercus parvula* var. *shrevei*. The mixed redwood is primarily composed of coastal redwood *Sequoia sempervirens*, and douglas fir *Pseudotsuga menziesii*. The redwood habitat is almost entirely composed of coastal redwood. Adjoining these forests is meadow habitat interspersed with coyote brush *Baccharis pilularis*.

In September of 2019, the UC Santa Cruz campus housed 9,339 students and had five active dining halls and eleven cafes [22]. Garbage was contained in plastic garbage bins on the back or side of all cafes and dining halls, save for one open compost heap in the west end (Fig 2). Standard metal trash bins were also placed around cafés and dining halls towards the front, all of which were either exposed or had a swing lid. The campus has recorded the presence of both invasive *Rattus rattus* and *Rattus norvegicus* presence in the surrounding area but lacks

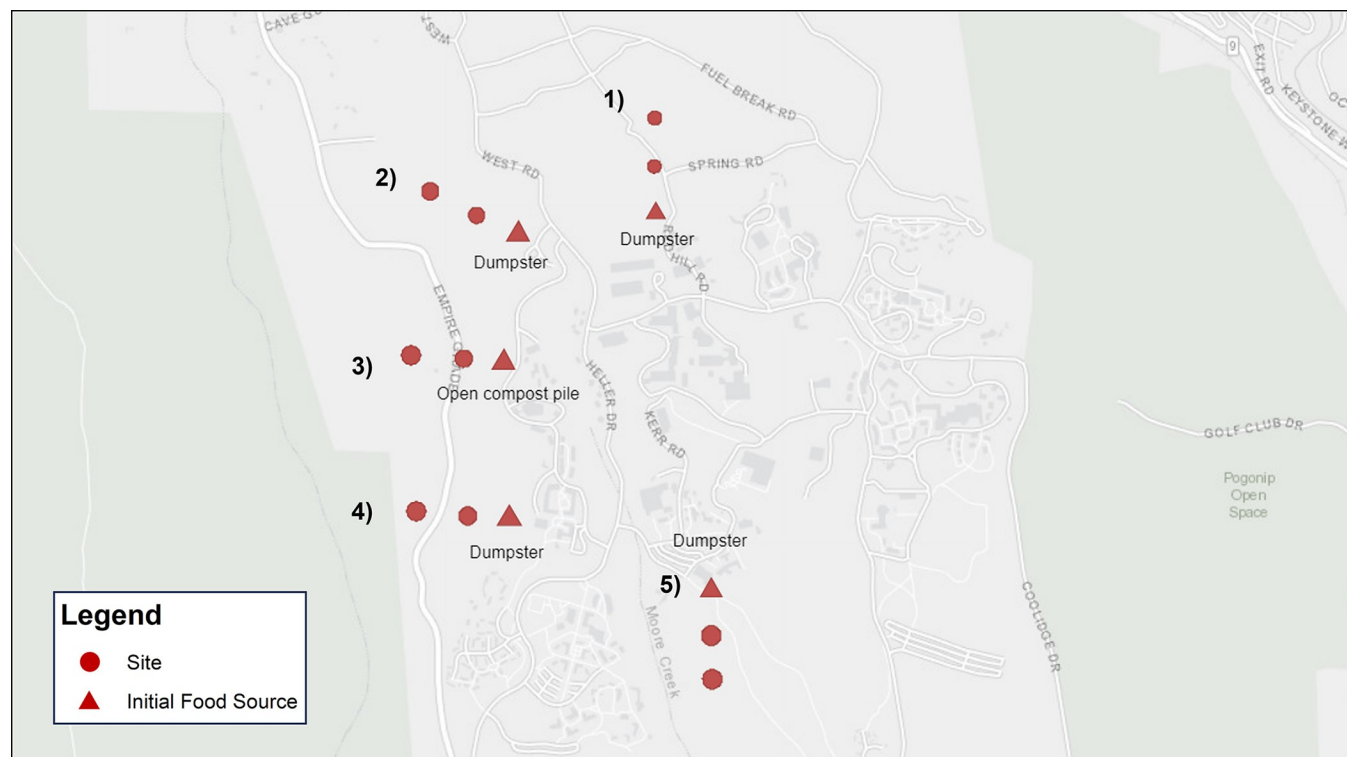

**Fig 1. A 1:2000 scale map of the 2.12 km<sup>2</sup> study area: The UC Santa Cruz campus.** Sites remained constant across Trapping Periods 1 and 2. Cameras placed at initial food sources (labeled) are marked with a triangle, while cameras placed at each sequential site (75 m and 150 m toward natural habitat, respectively) are marked with a circle. Site 1 was located in pure redwood habitat, Sites 2 and 3 were located in mixed redwood habitats, and Sites 4 and 5 were located in mixed oak habitats.

<https://doi.org/10.1371/journal.pone.0308917.g001>

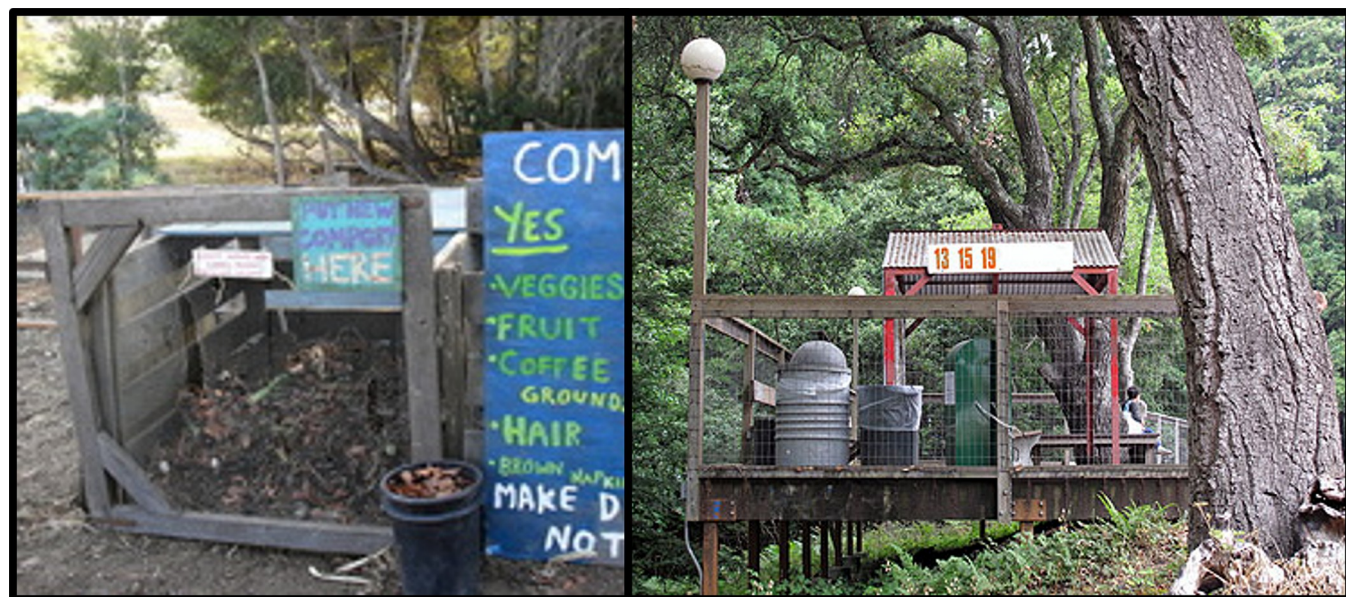

**Fig 2. Examples of the trash vessels in the study.** Depicted on the left is an open compost heap, and depicted on the right is an open trash can and a metal trash can with a swing lid.

<https://doi.org/10.1371/journal.pone.0308917.g002>

any specific distribution data [21]. During late March of 2020, Santa Cruz County issued a COVID-19 lockdown decree to slow the spread of Sars-CoV-2, which mandated that all non-essential work and public groupings be suspended [23]. On March 10, 2020, the UC Santa Cruz administration suspended in-person classes. The on-campus student population decreased to approximately 1,000 students, and only two dining halls remained open (without on-site dining) and limited their hours [22]. As a result, dumpsters and other sources of garbage were quickly emptied and not replaced, thus eliminating most sources of wildlife dietary supplementation. At pre- COVID lockdown levels, the campus generated 0.58 kgs/person/day of trash, of which 43% was organic matter (i.e., food scraps, compostable containers, soiled paper, etc.). Post- COVID lockdown, organic waste decreased by 72% [22]. While trace amounts of human supplementation still existed in post-COVID lockdown conditions, levels of refuse decreased to such a large extent that we maintain the experiment still functions as a removal experiment.

## Study design

We directly measured rat activity in pre- and post- COVID lockdown conditions via camera trapping. All fieldwork was conducted from November 23, 2019, to February 14, 2021, in two trapping periods across 15 sites and in all three habitats. Trapping in Period 1 (November 2019 – March 2020) served as a comparison for invasive rat activity under normal (pre-COVID lockdown) conditions and lasted for 18 weeks. Initial trapping objectives were to collect small mammal activity data (for both invasive and native species), around the university and the surrounding area. However, the shelter in place COVID-19 lockdown provided opportunistic circumstances for a food and waste removal experiment. Trapping during Period 2 (mid-October 2020 – February 2021) took place during the COVID 19 lockdown and was conducted at the same sites as Trapping Period 1. Trapping Period 2 lasted for 17 weeks and served as our experimental treatment approximately one year later during the COVID lockdown when human supplementation was significantly reduced.

To test our hypothesis that invasive rats are more dependent on human supplementation than native rodents, the first site in each trapping transect originated at a semi-exposed source of human refuse (dining hall dumpster, compost pile, etc.). We placed each sequential site in a direction away from the initial refuse source, towards natural habitat (Fig 1). To reduce the probability of capturing the same individual, each transect contained three sites spaced 75 m apart each, for a total transect length of 150 m (i.e., a site at 0 m, 75 m, and 150m, five transects,  $N = 15$  total sites) [24]. To document small mammal activity, we used camera traps (Bushnell Trophy Cam; Bushnell Corp., Overland Park, KS, USA) that were left on-site for four consecutive nights, then collected and moved to the next transect ( $N = 12$  trap nights per each of the five transects; 60 total trap nights per trapping period). We programmed the cameras to capture three images every 30 seconds once movement was detected. Each site was baited with 30 grams of sunflower seeds (*Helianthus annuus*) and rebaited every other night. All sites were originally open to the public (vehicles not allowed) but were closed from March 31, 2020 to September 2, 2020. We did not physically capture or collect any animals during the course of this project, and all data were collected non-invasively via camera trapping. We note that as we did not mark or capture any animals, we focus here on activity rather than abundance to avoid any resampling bias [25].

## Data analysis

We tracked the activity of three genera of small mammal: deer mice *Peromyscus*, woodrats *Neotoma*, and the two species of invasive *Rattus*. *Peromyscus* and *Neotoma* served as our



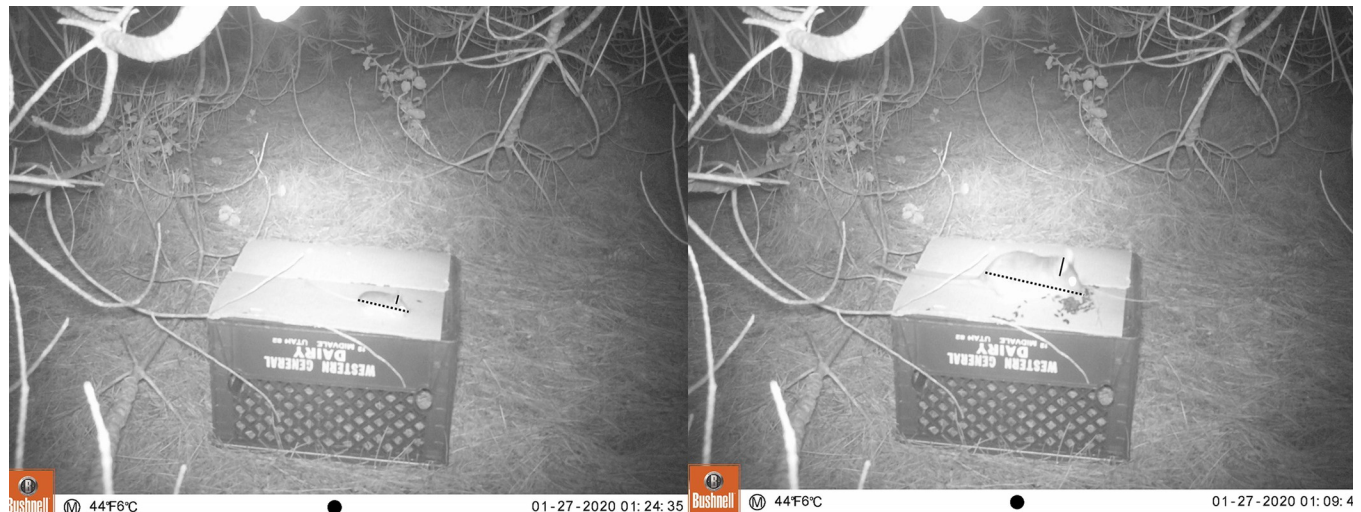

**Fig 3.** An example of rodent classification based on ear: body ratios (*Peromyscus* left, *Neotoma* right). Solid lines denote ear measurements, while dotted lines denote body measurements. All body measurements were taken from the tip of the snout to the base of the tail.

<https://doi.org/10.1371/journal.pone.0308917.g003>

comparison group to the invasive rats as they were exposed to the same human refuse, but as they are both native genera, they might be more adapted to foraging on natural resources. We categorized all captured animals in Image J (Ver. 1.8.0). For each animal, we measured the profile ear and body length, then compared the ratio between the two. Both *Neotoma* and *Peromyscus* have a similar ear-to-body ratio, but the body size of *Peromyscus* is substantially smaller than *Neotoma* (Fig 3) [21, 26]. Conversely, *Rattus* ear-to-body ratio is far larger than both *Peromyscus* and *Neotoma* [27]. We exclusively used photos where the animal's full body length and ear height were in view. After the animal was classified, we could then determine trapping success based on the rodent's presence or absence in the frame.

To test the influence of habitat on invasive *Rattus* activity and to account for errors in camera trap detection, we created an occupancy model in the *unmarked* package in R [28]. We binary-coded invasive *Rattus* presence or absence with a 1 or a 0, respectively, and indexed habitat composition at each site as a covariate [28]. We included habitat as a covariate as we thought it would have potential to impact both occupancy and detection by providing more resources or places to hide, respectively. We treated each individual night as an independent survey trial, which yielded four repeated surveys at each site. Finally, we back-transformed our detection and occupancy estimates and fitted 95% confidence intervals. To test the influence of habitat on invasive rat activity, we created three models: one with variable occupancy, one with variable detection, and one with both variable occupancy and variable detection as a function of habitat.

We created a number of mixed linear regression models beforehand to examine the possible impacts of refuse presence, habitat type, distance to refuse, and native small mammal presence on rat activity [29]. We also included trap night ( $N = 120$ ) and trap site ( $n = 15$ ) as random effects. We predicted that rat activity would decrease in the absence of human refuse regardless of habitat type or native small mammal presence. To measure the effects of human supplementation on native small mammals, we also created a second set of mixed linear regression models with the same predictors to serve as our control. Conversely, here we hypothesized that extra supplementation would have no effect on small mammal activity.

We included habitat as a predictor based on its potential to provide excess food or shelter from predators [30]. While certain habitats (e.g. mixed oak), might provide more access to

natural resources, we expected invasive rats to rely so heavily on human refuse that this extra supplementation would not offset decreases in rat activity. Similarly, we included the presence or absence of native small mammals as a predictor to incorporate resource competition between the two species [31]. However, while we expected small mammals would provide some amount of competition, we predicted the influence of native small mammals to be negligible as invasive rats would be used to relying on human refuse instead of natural resources. Finally, we included the distance to human refuse as a predictor, as we expected rat activity to decrease further away from human supplementation. We tested for collinearity between our predictors with a variance inflation factor test (VIF) and found an absence of collinearity. We then created a model candidate set that included the effects of these variables on invasive rat activity or native small mammal activity and evaluated the efficacy of the candidate models with AIC values [32]. We selected our top performing models based on the lowest AIC value [33].

## Results

### Small mammal distribution pre and post-COVID lockdown

After 14 weeks of trapping, we detected small mammal species at 80% of our sites in the pre-COVID lockdown period. We detected invasive *Rattus* species at five sites (33.3% success rate), and we detected *Peromyscus* at 10 sites (66.6% success rate). Finally, we detected *Neotoma* at four sites (26.6% success rate). At each site where we detected invasive *Rattus*, we also detected other small mammal species: 40% of invasive *Rattus* occupied sites were shared with *Neotoma* and 60% of invasive *Rattus*-occupied sites were shared with *Peromyscus* (Fig 4). After the decrease of human refuse in post-COVID lockdown conditions, we no longer detected invasive *Rattus* at any of our sites. Overall, we detected native small mammal activity at 80% of our sites in the post-COVID lockdown period. We detected *Peromyscus* at 60% of our sites and *Neotoma* at 26.66% of our sites (Fig 5).

### Habitat preference and rodent distribution

As there were zero detections to test for invasive rat habitat activity in post-COVID lockdown conditions, we used exclusively pre-COVID lockdown data for our habitat-covariate occupancy model. We found that habitat composition did not influence invasive rat activity, as invasive *Rattus* activity was relatively uniformly distributed throughout all habitat types (Tables 1 and 2).

Our top performing invasive rat model included both trapping period and habitat as predictors, and our top performing native small mammal model included trapping period, habitat, and distance to human refuse (Tables 3 and 4). When we compared invasive rat activity in pre- and post-COVID lockdown conditions, we found the decrease in *Rattus* activity to be highly significant ( $p < 0.01$ ). In contrast, we did not find any significant changes in activity in our native small mammal model in pre- and post-COVID lockdown conditions ( $p = 0.6$ ).

## Discussion

In this experiment, we found that the activity of peri-urban invasive species of *Rattus* is highly correlated with available human refuse. We observed little to no change in native foragers' activity (*Peromyscus* and *Neotoma*), with a slight decrease in *Peromyscus* and no change in *Neotoma* activity (Fig 5), indicating the removal of human supplementation had no significant effect on native rodent populations. This decrease in invasive rat activity suggests that the rats used this human supplementation to sustain their population levels. We observed this pattern

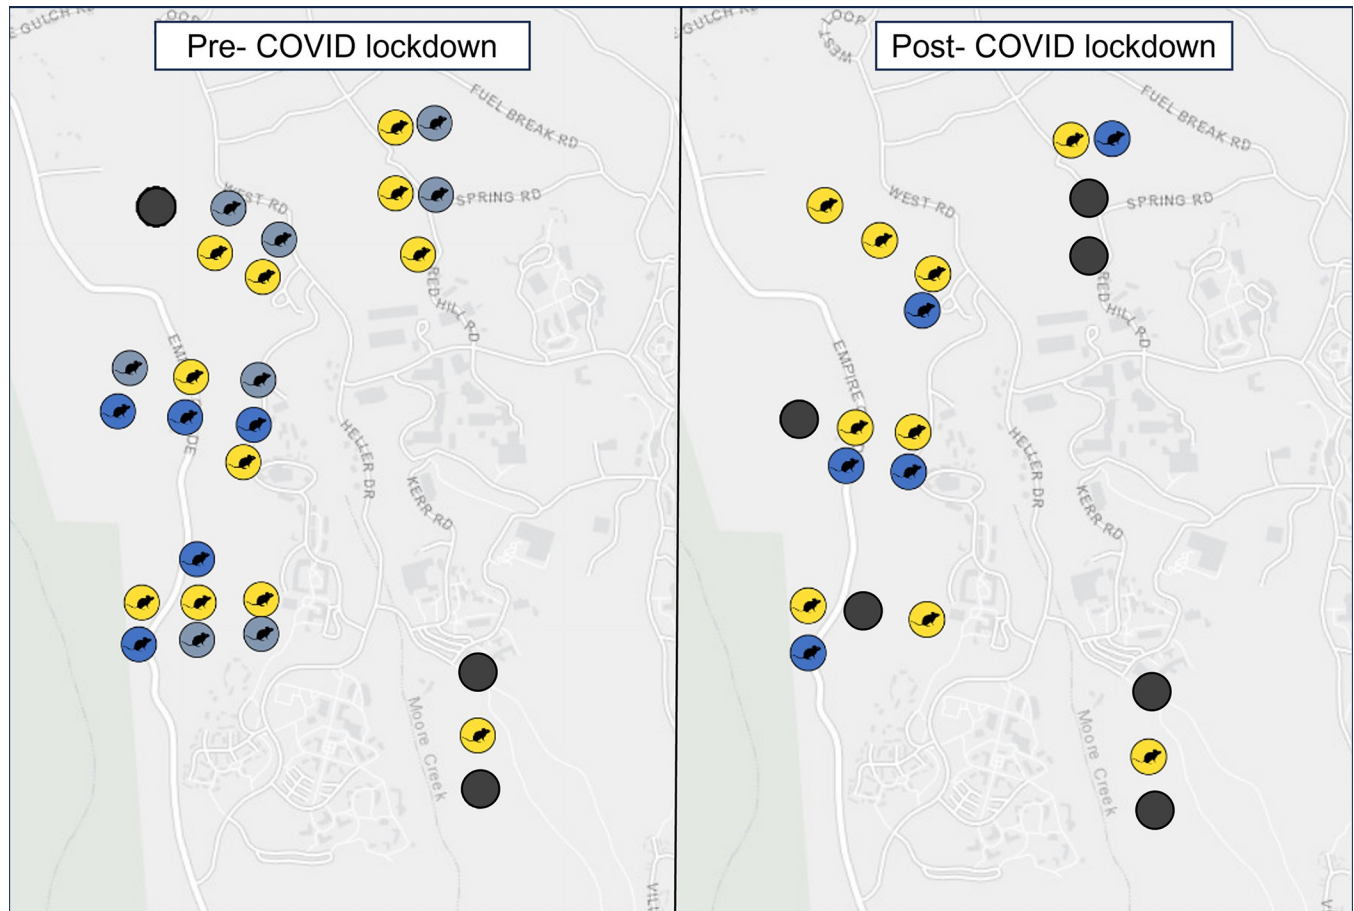

**Fig 4. Distribution of rodent presence or absence in pre- and post- COVID lockdown conditions.** Light gray circles indicate the presence of invasive *Rattus*, yellow circles indicate the presence of *Peromyscus*, blue circles indicate the presence of *Neotoma*, and dark gray circles indicate the absence of any rodent detections.

<https://doi.org/10.1371/journal.pone.0308917.g004>

across all habitat types, indicating that human-obligate foraging is not influenced by habitat composition (Table 2). Our results are bolstered by previous work, which found that urban populations of rats are also known to congregate around garbage receptacles. While urban populations of invasive rats have a comparatively faster growth rate and earlier maturation compared to purely wild populations of invasive rats, urban and peri-urban populations lack the ability to quickly recover from a disturbance [15–17, 34, 35]. Peri-urban rat populations are extremely sensitive to sudden resource loss, and these changes can alter the population equilibrium [15]. This is coupled with an extremely high mortality rate due to a variety of factors (e.g., competition, resource limitation, etc.) [9, 15]. Similarly, peri-urban and urban rats display high rates of neophobia, or resistance to new stimuli, in response to novel food resources. These periods of neophobia can be overcome, but are usually done so in a gradual manner, wherein the rat takes increasing amounts of food each trip [36].

Humans have a long history of conflict with invasive rats, and several measures have been taken against invasive rat populations [37–39]. Our study suggests that strict food waste management or removal could have similar and more targeted impacts as other methods of rodent control, including rodenticides. Urban areas have often employed rodenticides as a means of rat control [40, 41]. While the use of these chemicals can have a short-term reduction in

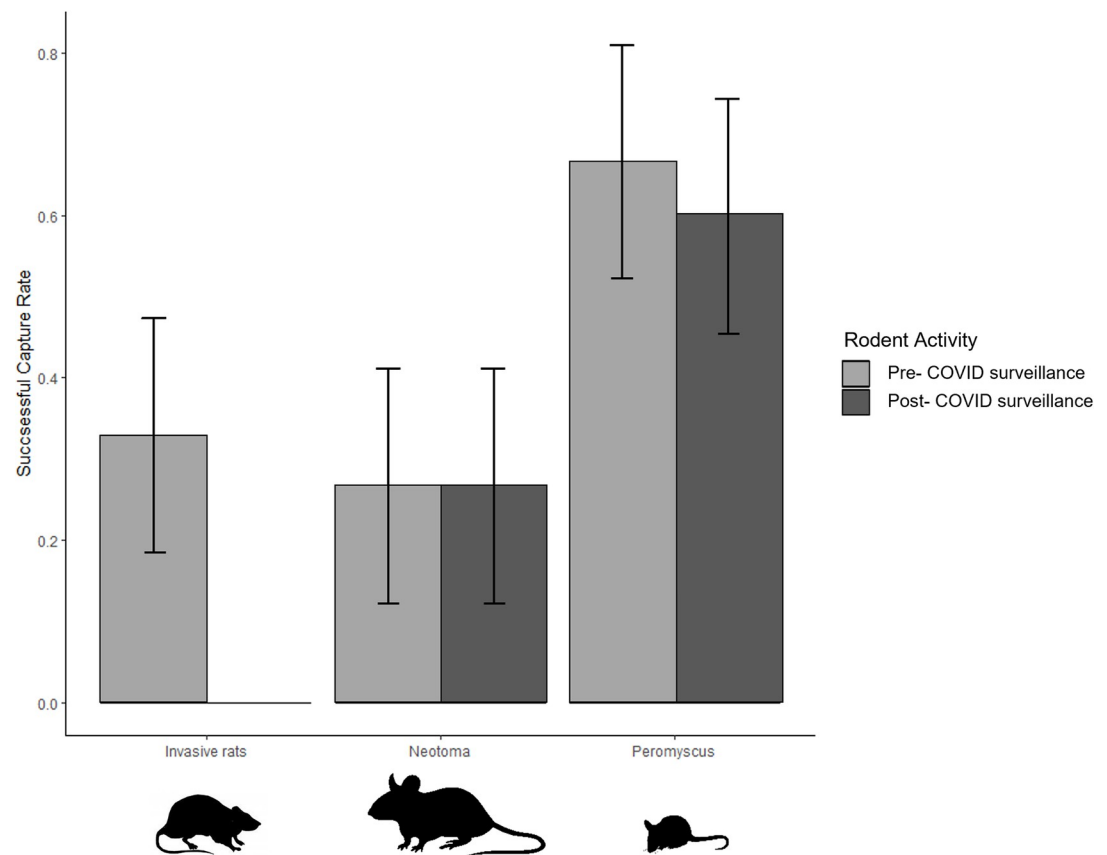

**Fig 5. Total site occupancy capture rates in *Neotoma*, *Peromyscus*, and invasive rats between trapping Periods 1 and 2.** “Successful capture rate” indicates the proportion of sites where the animal was captured. Invasive rat activity decreased between periods ( $\rho = 0.33$  successful capture rate during Trapping Period 1,  $\rho = 0$  successful capture rate during Trapping Period 2).

<https://doi.org/10.1371/journal.pone.0308917.g005>

rodents it is likely not an effective control method on without infrastructure modifications [42, 43]. Invasive rat populations are resilient to poisoning events, as their reproductive rates and neophobic behavior can quickly adjust after such events [34, 36]. Additionally, rodenticides have many indirect effects, as mammals that scavenge on poisoned rat carcasses are at a higher risk of secondary poisoning [35, 44, 45]. Our results provide experimental support that communities that include strict food waste management or removal as part of their rat control programs may see declines in invasive rat populations [34, 41].

We note that we did not track invasive rat activity outside our study area. While human supplementation decreases could have led to large population reductions, the opportunistic foraging behavior of rats could suggest that the rats moved to areas with a higher patch quality or more abundant temporary resources [46]. While camera traps have high accuracy in estimating population levels, other ephemeral seasonal variations (e.g. fluctuations in predator

**Table 1. Estimated proportion of total sites occupied by invasive *Rattus*, followed by the detection probability.** All results are back transformed linear combinations and fitted with a 95% confidence interval.

|           | Estimate | SE    | LinComb | CI low  | CI high |
|-----------|----------|-------|---------|---------|---------|
| Occupancy | 0.363    | 0.131 | -0.561  | -1.666  | 0.54480 |
| Detection | 0.639    | 0.144 | 0.571   | -0.3965 | 1.5367  |

<https://doi.org/10.1371/journal.pone.0308917.t001>



**Table 2. Occupancy model results using habitat as a covariate that affects occupancy, detection probability, or both (pre-COVID conditions only).** We tested three models: constant detection and variable occupancy, variable detection and constant occupancy, and variable detection and variable occupancy as a function of habitat.

|                                | Estimate | SE    | Z      | p-value | AIC    |
|--------------------------------|----------|-------|--------|---------|--------|
| Variable Occupancy             | -0.954   | 0.896 | -1.065 | 0.287   | 47.835 |
| Variable detection             | 0.787    | 1.03  | 0.763  | 0.446   | 49.423 |
| Variable Occupancy + Detection | 0.847    | 1.05  | 0.807  | 0.420   | 49.159 |

<https://doi.org/10.1371/journal.pone.0308917.t002>

**Table 3. Top three performing mixed linear regression models for the influence of human supplementation on invasive rat activity, including AIC values and the difference between each model and the lowest AIC ( $\Delta$ AIC).** All models included trap night and site as random effects.

| Fixed effects                                                  | AIC   | $\Delta$ AIC |
|----------------------------------------------------------------|-------|--------------|
| Human supplementation + habitat                                | 49.44 | 0            |
| Human supplementation + small mammal activity                  | 49.51 | 0.06         |
| Human supplementation + native small mammal activity + habitat | 50.43 | 0.99         |

<https://doi.org/10.1371/journal.pone.0308917.t003>

**Table 4. Top three performing mixed linear regression models for the influence of human supplementation on native small mammal activity, including AIC values and the difference between each model and the lowest AIC ( $\Delta$ AIC).** All models included trap night and site as random effects.

| Fixed effects                                                       | AIC    | $\Delta$ AIC |
|---------------------------------------------------------------------|--------|--------------|
| Habitat + distance to human supplementation + Human supplementation | -107.6 | 0            |
| Distance to human supplementation + Human supplementation           | -101.9 | 5.7          |
| Habitat + Human supplementation                                     | -101.8 | 5.8          |

<https://doi.org/10.1371/journal.pone.0308917.t004>

populations, change in climate) that we did not capture could have confounded the results [47]. Similarly, we solely recorded invasive and native rodent activity via camera traps, and did not live-capture any rodents or compare with any local pest control data, which could potentially limit the scope of this study [17]. Despite these limitations, our results indicate that peri-urban invasive rat populations may rely on human refuse to maintain a stable population, and proper control and management of human refuse can eradicate a local population regardless of its extension into natural habitat.

## Conclusion

In our non-invasive removal experiment, we directly measured rat activity before and after COVID lockdown conditions and found evidence that peri-urban invasive rat population levels are highly correlated with human refuse quantities. Furthermore, our results imply that invasive rats fail to maintain their former population levels purely on natural resources, regardless of patch quality. These results offer conservation implications, as they indicate that proper food waste management is likely to be more effective and more targeted at controlling invasive rats.

## Acknowledgments

We would like to thank Hannah G. Shapiro, Tyler D. Jessen, and Persia Khan for providing valuable intellectual contributions, Alex S. Jones, Anna C. Nisi, and Justin P. Suraci for essential help in planning the study design and field logistics, and Peter T. Raimondi for guidance in data analysis. We also thank two anonymous reviewers for making substantial improvements

to the manuscript. Picture Credits for Fig 1: Left—Megan Taylor, Right—Kevin Karplus. Credits for the base map of Santa Cruz in Figs 1 and 4 –Bureau of Land Management.

## Author Contributions

**Conceptualization:** Ishana Shukla, Christopher C. Wilmers.

**Formal analysis:** Ishana Shukla.

**Funding acquisition:** Ishana Shukla.

**Investigation:** Ishana Shukla.

**Supervision:** Christopher C. Wilmers.

**Visualization:** Ishana Shukla.

**Writing – original draft:** Ishana Shukla.

**Writing – review & editing:** Ishana Shukla, Christopher C. Wilmers.

## References

1. Civitello DJ, Allman BE, Morozumi C, Rohr JR. Assessing the direct and indirect effects of food provisioning and nutrient enrichment on wildlife infectious disease dynamics. *Philosophical Transactions of the Royal Society B: Biological Sciences*. 2018; 373: 20170101. <https://doi.org/10.1098/rstb.2017.0101> PMID: 29531153
2. Shochat E, Warren PS, Faeth SH, McIntyre NE, Hope D. From patterns to emerging processes in mechanistic urban ecology. *Trends in Ecology & Evolution*. 2006; 21: 186–191. <https://doi.org/10.1016/j.tree.2005.11.019> PMID: 16701084
3. McKinney T. The effects of provisioning and crop-raiding on the diet and foraging activities of human-commensal white-faced Capuchins (*Cebus capucinus*). *American Journal of Primatology*. 2011; 73: 439–448. <https://doi.org/10.1002/ajp.20919> PMID: 21432873
4. Newsome TM, Dellinger JA, Pavey CR, Ripple WJ, Shores CR, Wirsing AJ, et al. The ecological effects of providing resource subsidies to predators. *Global Ecology and Biogeography*. 2015; 24: 1–11. <https://doi.org/10.1111/geb.12236>
5. Puckett EE, Park J, Combs M, Blum MJ, Bryant JE, Caccone A, et al. Global population divergence and admixture of the brown rat (*Rattus norvegicus*). *Proceedings of the Royal Society B: Biological Sciences*. 2016; 283: 20161762. <https://doi.org/10.1098/rspb.2016.1762> PMID: 27798305
6. Oca DPM d, Lovera R, Cavia R. Where do Norway rats live? Movement patterns and habitat selection in livestock farms in Argentina. *Wildl Res*. 2017; 44: 324–333. <https://doi.org/10.1071/WR16219>
7. Kurle CM, Croll DA, Tershy BR. Introduced rats indirectly change marine rocky intertidal communities from algae- to invertebrate-dominated. *Proceedings of the National Academy of Sciences*. 2008; 105: 3800–3804. <https://doi.org/10.1073/pnas.0800570105> PMID: 18308929
8. Shepherd JD, Ditgen RS. Predation by *Rattus norvegicus* on a native small mammal in an Araucaria araucana forest of Neuquén, Argentina. *Rev chil hist nat*. 2012; 85: 159–159. <https://doi.org/10.4067/S0716-078X2012000200001>
9. Ruffino L, Russell JC, Pisanu B, Caut S, Vidal E. Low individual-level dietary plasticity in an island-invasive generalist forager. *Popul Ecol*. 2011; 53: 535–548. <https://doi.org/10.1007/s10144-011-0265-6>
10. Traweger D, Travnitzky R, Moser C, Walzer C, Bernatzky G. Habitat preferences and distribution of the brown rat (*Rattus norvegicus* Berk.) in the city of Salzburg (Austria): implications for an urban rat management. *J Pest Sci*. 2006; 79: 113–125. <https://doi.org/10.1007/s10340-006-0123-z>
11. Franklin SP, Hankerson SJ, Baker AJ, Dietz JM. Golden lion tamarin sleeping-site use and pre-retirement behavior during intense predation. *Am J Primatol*. 2007; 69: 325–335. <https://doi.org/10.1002/ajp.20340> PMID: 17154389
12. Langton S d., Cowan D p., Meyer A n. The occurrence of commensal rodents in dwellings as revealed by the 1996 English House Condition Survey. *Journal of Applied Ecology*. 2001; 38: 699–709. <https://doi.org/10.1046/j.1365-2664.2001.00631.x>
13. Ruscoe WA, Sweetapple PJ, Perry M, Duncan RP. Effects of Spatially Extensive Control of Invasive Rats on Abundance of Native Invertebrates in Mainland New Zealand Forests. *Conservation Biology*. 2013; 27: 74–82. <https://doi.org/10.1111/j.1523-1739.2012.01932.x> PMID: 23020670

14. Oh HYP, Humaidi M, Chan QY, Yap G, Ang KY, Tan J, et al. Association of rodents with man-made infrastructures and food waste in Urban Singapore. *Infection Ecology & Epidemiology*. 2022; 12: 2016560. <https://doi.org/10.1080/20008686.2021.2016560> PMID: 35111287
15. Feng AYT, Himsforth CG. The secret life of the city rat: a review of the ecology of urban Norway and black rats (*Rattus norvegicus* and *Rattus rattus*). *Urban Ecosyst*. 2014; 17: 149–162. <https://doi.org/10.1007/s11252-013-0305-4>
16. Neves Souza F, Awoniyi AM, Palma FAG, Begon M, Costa F. Short Communication: Increased Rat Sightings in Urban Slums During the COVID-19 Pandemic and the Risk for Rat-Borne Zoonoses. *Vector-Borne and Zoonotic Diseases*. 2021; 21: 160–161. <https://doi.org/10.1089/vbz.2020.2686> PMID: 33175660
17. Bedoya-Pérez MA, Ward MP, Loomes M, McGregor IS, Crowther MS. The effect of COVID19 pandemic restrictions on an urban rodent population. *Sci Rep*. 2021; 11: 12957. <https://doi.org/10.1038/s41598-021-92301-0> PMID: 34155237
18. Parsons MH, Richardson JL, Kiyokawa Y, Stryjek R, Corrigan RM, Deutsch MA, et al. Rats and the COVID-19 pandemic: considering the influence of social distancing on a global commensal pest. *Journal of Urban Ecology*. 2021; 7: juab027. <https://doi.org/10.1093/jue/juab027>
19. Parsons MH, Banks PB, Deutsch MA, Corrigan RF, Munshi-South J. Trends in urban rat ecology: a framework to define the prevailing knowledge gaps and incentives for academia, pest management professionals (PMPs) and public health agencies to participate. *Journal of Urban Ecology*. 2017; 3: jux005. <https://doi.org/10.1093/jue/jux005>
20. Harris DB. Review of negative effects of introduced rodents on small mammals on islands. *Biol Invasions*. 2009; 11: 1611–1630. <https://doi.org/10.1007/s10530-008-9393-0>
21. Reynosa G, Thompson S. SMURF Guide. Kenneth S Norris Center for Natural History. 2019; 22.
22. University of California, Santa Cruz. Zero Waste Plan. 2022 [cited 7 Oct 2022]. Available: <https://sustainability.ucsc.edu/initiatives/zero-waste/index.html>
23. County of Santa Cruz, Public Health Division. Shelter in Place Order March 16 2020. 2020 Mar.
24. Awoniyi AM, Souza FN, Zeppelini CG, Xavier BIA, Barreto AM, Santiago DCC, et al. Using Rhodamine B to assess the movement of small mammals in an urban slum. *Methods in Ecology and Evolution*. 2021; 12: 2234–2242. <https://doi.org/10.1111/2041-210X.13693>
25. Sollmann R. A gentle introduction to camera-trap data analysis. *African Journal of Ecology*. 2018; 56: 740–749. <https://doi.org/10.1111/aje.12557>
26. English PF. The Dusky-Footed Wood Rat (*Neotoma fuscipes*). *J Mammal*. 1923; 4: 1–9. <https://doi.org/10.2307/1373521>
27. Calhoun JB, Health (U.S.) NI of. The Ecology and Sociology of the Norway Rat. U.S. Department of Health, Education, and Welfare, Public Health Service; 1963.
28. Fiske I. Unmarked: An R Package for Fitting Hierarchical Models of Wildlife Occurrence and Abundance. 2011 [cited 3 Mar 2020]. Available: [http://apps.webofknowledge.com.oca.ucsc.edu/CitedFullRecord.do?product=WOS&colName=WOS&SID=6CvnVnqLJQ43mY41bIT&search\\_mode=CitedFullRecord&isickref=WOS:000294232000001](http://apps.webofknowledge.com.oca.ucsc.edu/CitedFullRecord.do?product=WOS&colName=WOS&SID=6CvnVnqLJQ43mY41bIT&search_mode=CitedFullRecord&isickref=WOS:000294232000001)
29. Warton DI, Lyons M, Stoklosa J, Ives AR. Three points to consider when choosing a LM or GLM test for count data. *Methods in Ecology and Evolution*. 2016; 7: 882–890. <https://doi.org/10.1111/2041-210X.12552>
30. Miller KF, Wilson DJ, Hartley S, Innes JG, Fitzgerald NB, Miller P, et al. Invasive Urban Mammalian Predators: Distribution and Multi-Scale Habitat Selection. *Biology*. 2022; 11: 1527. <https://doi.org/10.3390/biology11101527> PMID: 36290430
31. Moore JH, Palmeirim AF, Peres CA, Ngoprasert D, Gibson L. Invasive rat drives complete collapse of native small mammal communities in insular forest fragments. *Current Biology*. 2022; 32: 2997–3004. e2. <https://doi.org/10.1016/j.cub.2022.05.053> PMID: 35709755
32. Burnham KP, Anderson DR, Huyvaert KP. AIC model selection and multimodel inference in behavioral ecology: some background, observations, and comparisons. *Behav Ecol Sociobiol*. 2011; 65: 23–35. <https://doi.org/10.1007/s00265-010-1029-6>
33. R Core Team. R: A language and environment for statistical computing. 2018. Available: <https://www.R-project.org/>
34. Himsforth CG, Feng AYT, Parsons K, Kerr T, Patrick DM. Using experiential knowledge to understand urban rat ecology: A survey of Canadian pest control professionals. *Urban Ecosyst*. 2013; 16: 341–350. <https://doi.org/10.1007/s11252-012-0261-4>
35. Murray M. Anticoagulant Rodenticide Exposure and Toxicosis in Four Species of Birds of Prey Presented to a Wildlife Clinic in Massachusetts, 2006–2010. *zamd*. 2011; 42: 88–97. <https://doi.org/10.1638/2010-0188.1> PMID: 22946375

36. Macdonald DW, Mathews F, Berdoy M, Singleton GR, Leirs H, Hinds LA, et al. The Behaviour and Ecology of *Rattus norvegicus*: from Opportunism to Kamikaze Tendencies. Ecologically-based Management of Rodent Pests. Canberra: Australian Centre for International Agricultural Research (ACIAR); 1999.
37. Aplin KP, Suzuki H, Chinen AA, Chesser RT, ten Have J, Donnellan SC, et al. Multiple Geographic Origins of Commensalism and Complex Dispersal History of Black Rats. PLoS One. 2011; 6. <https://doi.org/10.1371/journal.pone.0026357> PMID: 22073158
38. Canale DE, Dio VD, Massa B, Mori E. First successful eradication of invasive Norway rats *Rattus norvegicus* from a small Mediterranean island (Isola delle Femmine, Italy). *fozo*. 2019; 68: 29–34. <https://doi.org/10.25225/fozo.060.2019>
39. Pertile AC, Lustosa R, Carvalho-Pereira T, Pedra GG, Panti-May JA, Oliveira U, et al. Evaluation of the impact of chemical control on the ecology of *Rattus norvegicus* of an urban community in Salvador, Brazil. PLOS ONE. 2022; 17: e0270568. <https://doi.org/10.1371/journal.pone.0270568> PMID: 35857771
40. Drummond DC. Rat Free Towns: The Strategy of Area Control. Royal Society of Health Journal. 1970; 90: 131–133. <https://doi.org/10.1177/146642407009000305> PMID: 5465709
41. Lee MJ, Byers KA, Stephen C, Patrick DM, Corrigan R, Iwasawa S, et al. Reconsidering the “War on Rats”: What We Know From Over a Century of Research Into Municipal Rat Management. *Frontiers in Ecology and Evolution*. 2022; 10. Available: <https://www.frontiersin.org/articles/10.3389/fevo.2022.813600>
42. Awoniyi AM, Venegas-Vargas C, Souza FN, Zeppelini CG, Hacker KP, Carvalho-Pereira T, et al. Population dynamics of synanthropic rodents after a chemical and infrastructural intervention in an urban low-income community. *Sci Rep*. 2022; 12: 10109. <https://doi.org/10.1038/s41598-022-14474-6> PMID: 35710879
43. Channon D, Channon E, Roberts T, Haines R. Hotspots: are some areas of sewer network prone to re-infestation by rats (*Rattus norvegicus*) year after year? *Epidemiology & Infection*. 2006; 134: 41–48. <https://doi.org/10.1017/S0950268805004607> PMID: 16409649
44. Hegdal PL, Colvin BA. Potential hazard to eastern screech-owls and other raptors of brodifacoum bait used for vole control in orchards. *Environmental Toxicology and Chemistry*. 1988; 7: 245–260. <https://doi.org/10.1002/etc.5620070309>
45. Fisher P, O'Connor C, Wright G, Eason C. Anticoagulant residues in rats and secondary non-target risk. 2004.
46. Caut S, Angulo E, Courchamp F. Dietary shift of an invasive predator: rats, seabirds and sea turtles. *Journal of Applied Ecology*. 2008; 45: 428–437. <https://doi.org/10.1111/j.1365-2664.2007.01438.x> PMID: 18784794
47. Yiu SW, Gronwald M, Russell JC, Yiu SW, Gronwald M, Russell JC. Reliable detection of low-density Pacific rats by using camera trapping. *Wildl Res*. 2022 [cited 20 Nov 2022]. <https://doi.org/10.1071/WR22039>
